# Supplementary material for: Incremental effects of Eurotium cristatum fermentation of soybean on its nutrients, flavor profile and laxative regulation in experimental constipated rats
Source: Royal Society of Chemistry journal article supplement (doi:10.1039/d4fo06067a), 2025-01-01
Supplement: d4fo06067a1.pdf [file d4fo06067a1.pdf]

**Incremental Effects of *Eurotium Cristatum* Fermentation of Soybean on Its Nutrients,  
Flavor Profile and Laxative Regulation in Experimental Constipation Rats**

Chengcheng Yang, Xuefeng Chen, Pengfei Niu, Xingbin Yang\*, and Yalong Lu\*

*Shaanxi Engineering Laboratory for Food Green Processing and Safety Control, and Shaanxi  
Key Laboratory for Hazard Factors Assessment in Processing and Storage of Agricultural  
Products, College of Food Engineering and Nutritional Science, Shaanxi Normal University,  
Xi'an 710119, China*

-----  
Tel.: +86-29-85310580, Fax: +86-29-85310517

xbyang@snnu.edu.cn (X. Yang); luyalong@snnu.edu.cn (Y. Lu)

**Table S1 Primers Used for Real-Time Quantitative PCR**

| Gene           | Forward Primer (5'-3')       | Reverse Primer (5'-3')      |
|----------------|------------------------------|-----------------------------|
| TNF- $\alpha$  | CCTGTAGCCACGTCGTAGC          | TTGACCTCAGCGCTGACTTG        |
| IL-6           | TTGGGACTGATGTTGTTGACA        | TCATCGCTGTTGATAACAATCAGA    |
| AQP8           | GTAGTATGGACCTAC GTGAGATCAAGG | CTCTCCAGGTACACCATGTTACCAG   |
| MUC2           | GCTGCTCATTGAGAA GAACGATGC    | CTCTCCAGGTACACCATGTTACCAG G |
| $\beta$ -actin | TGGAATCCTGTGGCATCCATGAAAC    | TAAAACGCAGCTCAGTAACAGTCCG   |

**Table S2** The apparent outcome indicators in the rats

| Index                   | Normal                        | Model                          | NFSP                          | EFSP                          |
|-------------------------|-------------------------------|--------------------------------|-------------------------------|-------------------------------|
| Initial weight (g)      | 323.1 $\pm$ 12.0              | 325.6 $\pm$ 16.1               | 328.3 $\pm$ 22.4              | 326.3 $\pm$ 16.0              |
| Final weight (g)        | 485.0 $\pm$ 13.8 <sup>a</sup> | 445.2 $\pm$ 32.0 <sup>ab</sup> | 462.9 $\pm$ 33.4 <sup>a</sup> | 401.4 $\pm$ 36.3 <sup>b</sup> |
| Food intake (g/day/rat) | 20.3 $\pm$ 1.3                | 20.7 $\pm$ 1.1                 | 20.3 $\pm$ 0.4                | 20.5 $\pm$ 1.1                |

Different letters (a, b) indicate a significant difference ( $p < 0.05$ ).
